# Supplementary material for: City-Level Sugar-Sweetened Beverage Taxes and Youth Body Mass Index Percentile
Source: PubMed Central journal article supplement (PMC11292449; doi:10.1001/jamanetworkopen.2024.24822), 2024-07-31
Supplement: jamanetwopen-e2424822-s002.pdf [file jamanetwopen-e2424822-s002.pdf]

## Data Sharing Statement

Young. City-Level Sugar-Sweetened Beverage Taxes and Youth Body Mass Index Percentile. *JAMA Netw Open*. Published July 31, 2024. doi:10.1001/jamanetworkopen.2024.24822

### Data

**Data available:** No

### Additional Information

**Explanation for why data not available:** The data set includes health data of millions of KP members and is not available.
